# Supplementary material for: Mental Health Providers’ Attitudes About Criminal Justice–Involved Clients With Serious Mental Illness
Source: Atypon-hosted journal article supplement (doi:10.1176/appi.ps.201700321), 2018-02-01
Supplement: appi.ps.201700321.ds001.pdf [file appi.ps.201700321.ds001.pdf]

**APPENDIX A: SURVEY INSTRUMENT**

What is your job title? \_\_\_\_\_

How many years have you worked in psychiatric rehabilitation? \_\_\_\_\_

How many years have you worked at this organization? \_\_\_\_\_

How many years have you worked in your current position? \_\_\_\_\_

Are you female or male (circle): F / M

What is your race? (circle): white / black or African American / Asian /2+ races / Other race

Are you Hispanic or Latino? (circle) Y / N

**Please rate your agreement with the following statements (circle a SINGLE response for each item).**

|                          |                 |                  |              |                       |
|--------------------------|-----------------|------------------|--------------|-----------------------|
| <b>1</b>                 | <b>2</b>        | <b>3</b>         | <b>4</b>     | <b>5</b>              |
| <b>Strongly disagree</b> | <b>Disagree</b> | <b>Uncertain</b> | <b>Agree</b> | <b>Strongly agree</b> |

**Respond to the following statements while thinking about the last adult client you worked with:**

- I have a great deal of respect for this client..... 1 2 3 4 5
- I really like this client..... 1 2 3 4 5
- I find this client interesting..... 1 2 3 4 5
- I find it easy to understand this client..... 1 2 3 4 5
- This client is one of those people who makes me feel glad I work in psychiatric rehabilitation..... 1 2 3 4 5
- This client is the kind of person I could see myself being friends with..... 1 2 3 4 5
- This client frustrates me..... 1 2 3 4 5

**Please rate your similarity using the following scale (circle a SINGLE response for each item).**

|                       |                           |                                      |                         |                     |
|-----------------------|---------------------------|--------------------------------------|-------------------------|---------------------|
| <b>1</b>              | <b>2</b>                  | <b>3</b>                             | <b>4</b>                | <b>5</b>            |
| <b>Very different</b> | <b>Somewhat different</b> | <b>Neither different nor similar</b> | <b>Somewhat similar</b> | <b>Very similar</b> |

**Respond to the following statements while thinking about the last adult client you worked with:**

- The way this client and I speak is \_\_\_\_\_..... 1 2 3 4 5
- The way this client and I reason about problems is \_\_\_\_\_..... 1 2 3 4 5
- This client and I have \_\_\_\_\_ styles of communication..... 1 2 3 4 5
- The types of people I spend my free time with and the types of people this client spends his/her free time with are \_\_\_\_\_..... 1 2 3 4 5

**CRIMINAL JUSTICE INVOLVEMENT SECTION**

The final question sets in this survey all ask about people with serious mental illness with past or current involvement in the criminal justice system. By criminal justice involvement, we mean individuals who have ever been arrested, convicted, or on parole or probation.

**Some of the questions in this section are the same as questions asked above, except instead of asking about clients in general, we are now asking specifically about CLIENTS WITH PAST OR CURRENT CRIMINAL JUSTICE INVOLVEMENT.**

Do you currently work with any clients with past or current criminal justice involvement?

Yes No Unsure

Please rate your agreement with the following statements (circle a SINGLE response for each item).

|                                                                                                                                                                        | 1                 | 2        | 3         | 4     | 5              |
|------------------------------------------------------------------------------------------------------------------------------------------------------------------------|-------------------|----------|-----------|-------|----------------|
|                                                                                                                                                                        | Strongly disagree | Disagree | Uncertain | Agree | Strongly agree |
| I am comfortable serving clients with past or current criminal justice involvement.....                                                                                | 1                 | 2        | 3         | 4     | 5              |
| Working with clients with past or current criminal justice involvement is a good use of staff time and resources.....                                                  | 1                 | 2        | 3         | 4     | 5              |
| Working with clients with past or current criminal justice involvement takes more time than working with other clients in this organization.....                       | 1                 | 2        | 3         | 4     | 5              |
| Working with clients with past or current criminal justice system involvement is more emotionally exhausting than working with other clients at this organization..... | 1                 | 2        | 3         | 4     | 5              |
| Compared to other clients at this organization, working with clients with past or current criminal justice involvement is more challenging.....                        | 1                 | 2        | 3         | 4     | 5              |

**IF YOU DO NOT CURRENTLY WORK WITH ANY CLIENTS WITH PAST OR CURRENT CRIMINAL JUSTICE INVOLVEMENT, SKIP THE ITEMS BELOW.**

Please rate your agreement with the following statements (circle a SINGLE response for each item).

|  | 1                 | 2        | 3         | 4     | 5              |
|--|-------------------|----------|-----------|-------|----------------|
|  | Strongly disagree | Disagree | Uncertain | Agree | Strongly agree |

**Respond to the following statements while thinking about the last adult client you worked with who has PAST OR CURRENT CRIMINAL JUSTICE INVOLVEMENT:**

|                                                                                                     |   |   |   |   |   |
|-----------------------------------------------------------------------------------------------------|---|---|---|---|---|
| I have a great deal of respect for this client.....                                                 | 1 | 2 | 3 | 4 | 5 |
| I really like this client.....                                                                      | 1 | 2 | 3 | 4 | 5 |
| I find this client interesting.....                                                                 | 1 | 2 | 3 | 4 | 5 |
| I find it easy to understand this client.....                                                       | 1 | 2 | 3 | 4 | 5 |
| This client is one of those people who makes me feel glad I work in psychiatric rehabilitation..... | 1 | 2 | 3 | 4 | 5 |
| This client is the kind of person I could see myself being friends with.....                        | 1 | 2 | 3 | 4 | 5 |
| This client frustrates me.....                                                                      | 1 | 2 | 3 | 4 | 5 |

Please rate your similarity using the following scale (circle a SINGLE response for each item).

| 1              | 2                  | 3                             | 4                | 5            |
|----------------|--------------------|-------------------------------|------------------|--------------|
| Very different | Somewhat different | Neither different nor similar | Somewhat similar | Very similar |

Respond to the following statements while thinking about the last adult client you worked with who has PAST OR CURRENT CRIMINAL JUSTICE INVOLVEMENT:

- The way this client and I speak is \_\_\_\_\_ 1 2 3 4 5
- The way this client and I reason about problems is \_\_\_\_\_ 1 2 3 4 5
- This client and I have \_\_\_\_\_ styles of communication..... 1 2 3 4 5
- The types of people I spend my free time with and the types of people this client spends his/her free time with are \_\_\_\_\_ 1 2 3 4 5

THANK YOU! WE GREATLY APPRECIATE YOUR PARTICIPATION.

APPENDIX B. Provider experiences and attitudes stratified by provider race

| Providers' experience with criminal justice-involved individuals with serious mental illness (N=607)                                                              |                 |    |                     |    |
|-------------------------------------------------------------------------------------------------------------------------------------------------------------------|-----------------|----|---------------------|----|
| Agreement with following statement...                                                                                                                             | White Providers |    | Non-White Providers |    |
|                                                                                                                                                                   | n               | %  | n                   | %  |
| I am comfortable serving clients with past or current criminal justice involvement                                                                                | 301             | 87 | 216                 | 83 |
| Working with clients with past or current criminal justice involvement is a good use of staff time and resources                                                  | 295             | 86 | 181                 | 70 |
| Working with clients with past or current criminal justice system involvement takes more time than working with other clients in this organization                | 127             | 37 | 108                 | 42 |
| Compared to other clients at this organization, working with clients with past or current criminal justice involvement is more challenging                        | 115             | 33 | 93                  | 36 |
| Working with clients with past or current criminal justice system involvement is more emotionally exhausting than working with other clients at this organization | 69              | 20 | 76                  | 29 |

| Providers' attitudes toward clients with versus without criminal justice system involvement (N=541) <sup>1</sup>       |                                              |    |                                           |       |                                              |    |                                           |       |
|------------------------------------------------------------------------------------------------------------------------|----------------------------------------------|----|-------------------------------------------|-------|----------------------------------------------|----|-------------------------------------------|-------|
| Agreement with following statement...                                                                                  | White Providers                              |    |                                           |       | Non-White Providers                          |    |                                           |       |
|                                                                                                                        | Clients with no criminal justice involvement |    | Clients with criminal justice involvement |       | Clients with no criminal justice involvement |    | Clients with criminal justice involvement |       |
|                                                                                                                        | n                                            | %  | n                                         | %     | n                                            | %  | n                                         | %     |
| <b>Positive Regard</b>                                                                                                 |                                              |    |                                           |       |                                              |    |                                           |       |
| I have a great deal of respect for this client                                                                         | 291                                          | 94 | 235                                       | 76*** | 221                                          | 95 | 189                                       | 82*** |
| I find this client interesting                                                                                         | 291                                          | 94 | 255                                       | 83*** | 212                                          | 91 | 191                                       | 85*   |
| I really like this client                                                                                              | 261                                          | 85 | 213                                       | 69*** | 205                                          | 89 | 173                                       | 75*** |
| This client is one of those people who makes me feel glad I went into psychiatric rehabilitation                       | 262                                          | 85 | 214                                       | 69*** | 206                                          | 89 | 163                                       | 71*** |
| I find it easy to understand this client                                                                               | 236                                          | 77 | 207                                       | 67**  | 187                                          | 82 | 163                                       | 71**  |
| This client is the kind of person I could see myself being friends with                                                | 104                                          | 34 | 67                                        | 22*** | 118                                          | 51 | 89                                        | 39*** |
| This client frustrates me                                                                                              | 107                                          | 35 | 103                                       | 33    | 63                                           | 27 | 68                                        | 30    |
| <b>Perceived Similarity</b>                                                                                            |                                              |    |                                           |       |                                              |    |                                           |       |
| <b>Rated similar in following statements...</b>                                                                        | n                                            | %  | n                                         | %     | n                                            | %  | n                                         | %     |
| The way this client and I speak is ...                                                                                 | 139                                          | 45 | 108                                       | 35**  | 98                                           | 43 | 99                                        | 43    |
| This client and I ... styles of communication                                                                          | 100                                          | 33 | 70                                        | 23**  | 73                                           | 32 | 68                                        | 30    |
| The way this client and I reason about problems is...                                                                  | 77                                           | 25 | 61                                        | 20    | 67                                           | 29 | 67                                        | 29    |
| The types of people I spend my free time with and the types of people this client spends his/her free time with are... | 27                                           | 9  | 22                                        | 7     | 43                                           | 19 | 48                                        | 21    |

\*p<.050; \*\*p<.010; \*\*\*p<.001. Differences in proportions were calculated using McNemar's chi-Square test. <sup>1</sup>The providers who reported that they do not currently work with any clients with past or current criminal justice system involvement were excluded from this analysis.

APPENDIX C. Provider experiences and attitudes by provider gender

| Providers' experience with criminal justice-involved individuals with serious mental illness (N=615)                                                              |                        |    |                          |    |
|-------------------------------------------------------------------------------------------------------------------------------------------------------------------|------------------------|----|--------------------------|----|
|                                                                                                                                                                   | Male Providers (N=164) |    | Female Providers (N=451) |    |
|                                                                                                                                                                   | n                      | %  | n                        | %  |
| <b>Agreement with following statement...</b>                                                                                                                      |                        |    |                          |    |
| I am comfortable serving clients with past or current criminal justice involvement                                                                                | 135                    | 82 | 390                      | 87 |
| Working with clients with past or current criminal justice involvement is a good use of staff time and resources                                                  | 130                    | 79 | 353                      | 79 |
| Working with clients with past or current criminal justice system involvement takes more time than working with other clients in this organization                | 62                     | 38 | 173                      | 39 |
| Compared to other clients at this organization, working with clients with past or current criminal justice involvement is more challenging                        | 55                     | 34 | 154                      | 34 |
| Working with clients with past or current criminal justice system involvement is more emotionally exhausting than working with other clients at this organization | 43                     | 26 | 103                      | 23 |

| Providers' attitudes toward clients with versus without criminal justice system involvement (N=550) <sup>1</sup>       |                                              |    |                                           |       |                                              |    |                                           |       |
|------------------------------------------------------------------------------------------------------------------------|----------------------------------------------|----|-------------------------------------------|-------|----------------------------------------------|----|-------------------------------------------|-------|
|                                                                                                                        | Male Providers (N=155)                       |    |                                           |       | Female Providers (N=395)                     |    |                                           |       |
|                                                                                                                        | Clients with no criminal justice involvement |    | Clients with criminal justice involvement |       | Clients with no criminal justice involvement |    | Clients with criminal justice involvement |       |
| <b>Positive Regard</b>                                                                                                 | n                                            | %  | n                                         | %     | n                                            | %  | n                                         | %     |
| <b>Agreement with following statement...</b>                                                                           |                                              |    |                                           |       |                                              |    |                                           |       |
| I have a great deal of respect for this client                                                                         | 144                                          | 93 | 119                                       | 77*** | 375                                          | 95 | 312                                       | 79*** |
| I find this client interesting                                                                                         | 136                                          | 88 | 123                                       | 81    | 372                                          | 95 | 330                                       | 85*** |
| I really like this client                                                                                              | 128                                          | 83 | 108                                       | 70**  | 344                                          | 88 | 284                                       | 72*** |
| This client is one of those people who makes me feel glad I went into psychiatric rehabilitation                       | 129                                          | 83 | 106                                       | 69*** | 347                                          | 88 | 279                                       | 71*** |
| I find it easy to understand this client                                                                               | 115                                          | 75 | 104                                       | 68    | 315                                          | 80 | 271                                       | 69*** |
| This client is the kind of person I could see myself being friends with                                                | 68                                           | 44 | 46                                        | 30*** | 156                                          | 40 | 113                                       | 29*** |
| This client frustrates me                                                                                              | 56                                           | 36 | 45                                        | 29    | 116                                          | 29 | 130                                       | 33    |
| <b>Perceived Similarity</b>                                                                                            |                                              |    |                                           |       |                                              |    |                                           |       |
| <b>Rated similar in following statements...</b>                                                                        | n                                            | %  | n                                         | %     | n                                            | %  | n                                         | %     |
| The way this client and I speak is ...                                                                                 | 61                                           | 40 | 56                                        | 36    | 178                                          | 46 | 154                                       | 39*   |
| This client and I ... styles of communication                                                                          | 48                                           | 31 | 43                                        | 28    | 128                                          | 33 | 97                                        | 25**  |
| The way this client and I reason about problems is...                                                                  | 35                                           | 23 | 39                                        | 25    | 110                                          | 28 | 91                                        | 23*   |
| The types of people I spend my free time with and the types of people this client spends his/her free time with are... | 19                                           | 12 | 23                                        | 15    | 51                                           | 13 | 47                                        | 12    |

\* $p < .050$ ; \*\* $p < .010$ ; \*\*\* $p < .001$ . Differences in proportions were calculated using McNemar's chi-Square test. <sup>1</sup>The providers who reported that they do not currently work with any clients with past or current criminal justice system involvement were excluded from this analysis.
